# Supplementary material for: General Designs Reveal Distinct Codes in Protein-Coding and Non-Coding Human DNA
Source: MDPI journal article supplement (doi:10.3390/genes13111970), 2022-10-28
Supplement: s1 [file s1]

The notation ApA, ApC, ApT etc... denotes a 'nearest neighbour' step or dinucleotide in DNA in the 5' to 3' orientation, along the phosphate backbone. It is given/used as a biochemical distinction between a variety of different possible doublets.
